# Supplementary material
Source: Springer Nature journal article supplement (https://www.springermedizin.de/resource/supplementary/12916_2006_103_MOESM2_ESM.pdf/9599212)

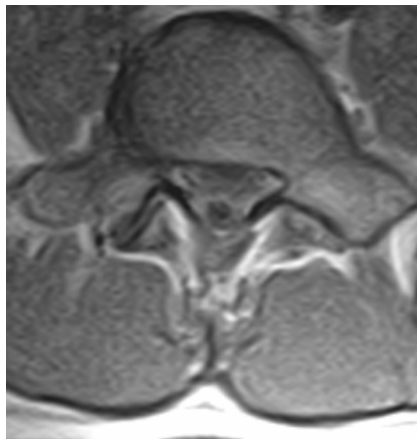

Grade 0 (none)

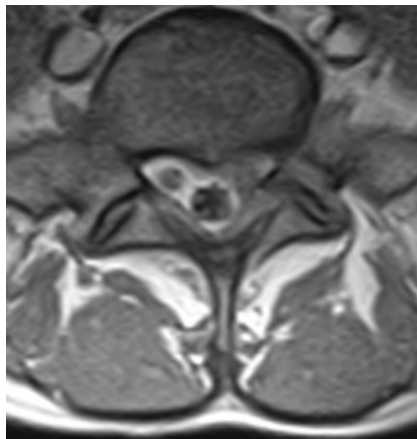

Grade 1 (slight)

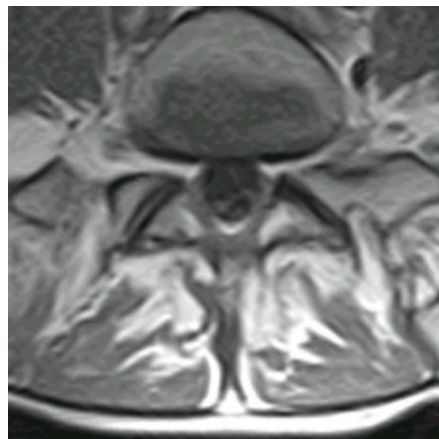

Grade 2 (severe)

Supplement: MOESM2 [file 9599212]
